# Supplementary material for: Persistence and adherence to levodopa adjunct medications in elderly patients with Parkinson’s disease: a retrospective cohort study using a Japanese claims database
Source: Front Neurol. 2025 Apr 10;16:1560431. doi: 10.3389/fneur.2025.1560431 (PMC12018396; doi:10.3389/fneur.2025.1560431)
Supplement: Supplementary file 1 [file Table_1.xlsx]

## Sheet: Supplementary Table 1
Supplementary Table 1. Drug codes
Name	ATC code	First 8 digits of YJ codea
17 drugs included in the analysis for the indication of PD
Pramipexole Hydrochloride Hydrate (immediate-release tablet)	N04BC05	1169012F
Pramipexole Hydrochloride Hydrate (sustained-release tablet)	N04BC05	1169012G
Ropinirole Hydrochloride (immediate-release tablet)	N04BC04	1169013F
Ropinirole Hydrochloride (sustained-release tablet)	N04BC04	1169013G
Ropinirole Hydrochloride (transdermal patch)	N04BC04	1169701S
Rotigotine (transdermal patch)	N04BC09	1169700S
Selegiline Hydrochloride	N04BD01	1169010F
Rasagiline Mesilate	N04BD02	1169017F
Safinamide Mesilate	N04BD03	1169018F
Entacapone	N04BX02	1169014F
Opicapone	N04BX04	1169019F
Droxidopa	C01CA27	1169006C, 1169006F, 1169006M
Amantadine Hydrochloride	N04BB01	1161001C, 1161001F
Istradefylline	N04CX01	1169016F
Zonisamide	N03AX15	1169015F
Trihexyphenidyl Hydrochloride	N04AA01	1169002B, 1169001F
Biperiden Hydrochloride	N04AA02	1162001B, 1162001C, 1162001F
Others
Levodopa	N04BA01	1164001B, 1164001F, 1164001M
Levodopa benserazide hydrochloride	N04BA02	1169100F
Levodopa Carbidopa Hydrate	N04BA02	1169101F
Levodopa Carbidopa Hydrate Entacapone	N04BA03	1169102F
Bromocriptine Mesilateb	G02CB01, N04BC01	1169005F
Cabergolineb	G02CB03, N04BC06	1169011F
Pergolide Mesilateb	N04BC02	1169008D, 1169008F
a YJ code is individual drug code. We used the first 8 digits of the YJ code to identify drugs, which specify medicinal efficacy classification, route of administration, ingredients, and dosage form.
b These drugs were used only to calculate levodopa equivalent dose.
Abbreviations: ATC, Anatomical Therapeutic Chemical; PD, Parkinson’s disease.

## Sheet: Supplementary Table 2 
Supplementary Table 2. Disease codes
Name	ICD-10 code
Parkinson's disease	G20
Multiple system atrophy	G90.3
Progressive supranuclear palsy	G23.1
Basal ganglia degeneration	G23.8
Vascular Parkinson’s syndrome	G21.4
Normal pressure hydrocephalus	G91.2
Drug-induced Parkinson’s syndrome	G21.1
Schizophrenia	F20
Depression	F32, F33.0–F33.4, F33.9, F41.2
Insomnia	G47.0
Dementia	F00–F03, R41.3
Type 2 diabetes	E11, E14
Hypertension	I10
Liver failure	B15–B19, K70–K77
Renal failure	I12.0, I13.1, I13.2, N00–N01, N03–N05, N08.0, N08.4, N08.5, N15.9, N16.3, N16.4, N17–N19, N99.0
Constipation	K59.0
Pain	G64, G96.9, M17.1, M47.8, R52.9
Abbreviation: ICD-10, International Statistical Classification of Diseases 10th Revision.

## Sheet: Supplementary Table 3
Supplementary Table 3. Background characteristics of the study population by individual drug
Demographic characteristics	All drugs	Pramipexole (immediate-release tablet)	Pramipexole (sustained-release tablet)	Ropinirole (immediate-release tablet)	Ropinirole (sustained-release tablet)	Ropinirole (transdermal patch)	Rotigotine (transdermal patch)	Selegiline	Rasagiline	Safinamide	Entacapone	Opicapone	Trihexyphenidyl	Biperiden	Droxidopa	Amantadine	Istradefylline	Zonisamide
	n = 7605	n = 329	n = 345	n = 52	n = 429	n = 1358	n = 867	n = 425	n = 932	n = 876	n = 635	n = 920	n = 200	n = 7	n = 574	n = 459	n = 452	n = 850
Age (years), mean (SD)	77.2 (7.0)	78.6 (6.6)	76.6 (6.8)	79.9 (7.0)	77.1 (6.7)	76.6 (6.8)	78.3 (6.8)	76.7 (7.2)	76.5 (6.7)	76.0 (7.0)	77.2 (7.5)	75.2 (7.3)	75.5 (8.5)	73.3 (9.0)	79.0 (6.6)	78.2 (6.9)	77.7 (6.9)	77.8 (6.6)
40–54 years	47 (0.6)	1 (0.3)	5 (1.4)	0 (0.0)	0 (0.0)	4 (0.3)	9 (1.0)	1 (0.2)	4 (0.4)	7 (0.8)	10 (1.6)	13 (1.4)	2 (1.0)	0 (0.0)	3 (0.5)	2 (0.4)	4 (0.9)	3 (0.4)
55–64 years	284 (3.7)	11 (3.3)	7 (2.0)	0 (0.0)	19 (4.4)	67 (4.9)	17 (2.0)	20 (4.7)	39 (4.2)	48 (5.5)	16 (2.5)	47 (5.1)	20 (10.0)	1 (14.3)	9 (1.6)	14 (3.1)	14 (3.1)	24 (2.8)
65–74 years	1983 (26.1)	59 (17.9)	105 (30.4)	10 (19.2)	110 (25.6)	378 (27.8)	173 (20.0)	121 (28.5)	278 (29.8)	255 (29.1)	176 (27.7)	346 (37.6)	60 (30.0)	2 (28.6)	115 (20.0)	106 (23.1)	109 (24.1)	209 (24.6)
75–84 years	4318 (56.8)	201 (61.1)	188 (54.5)	27 (51.9)	253 (59.0)	782 (57.6)	533 (61.5)	225 (52.9)	521 (55.9)	494 (56.4)	344 (54.2)	440 (47.8)	93 (46.5)	3 (42.9)	345 (60.1)	268 (58.4)	260 (57.5)	494 (58.1)
≥85 years	973 (12.8)	57 (17.3)	40 (11.6)	15 (28.8)	47 (11.0)	127 (9.4)	135 (15.6)	58 (13.6)	90 (9.7)	72 (8.2)	89 (14.0)	74 (8.0)	25 (12.5)	1 (14.3)	102 (17.8)	69 (15.0)	65 (14.4)	120 (14.1)
Male, n (%)	3318 (43.6)	128 (38.9)	139 (40.3)	17 (32.7)	206 (48.0)	548 (40.4)	385 (44.4)	183 (43.1)	422 (45.3)	378 (43.2)	261 (41.1)	338 (36.7)	86 (43.0)	2 (28.6)	313 (54.5)	192 (41.8)	201 (44.5)	399 (46.9)
Daily levodopa dose (mg), median (IQR)a	300.0 (300.0–450.0)	300.0 (300.0–450.0)	300.0 (300.0–450.0)	300.0 (300.0–450.0)	300.0 (300.0–450.0)	400.0 (300.0–500.0)	350.0 (300.0–500.0)	300.0 (200.0–400.0)	300.0 (300.0–450.0)	400.0 (300.0–500.0)	400.0 (300.0–500.0)	450.0 (300.0–600.0)	300.0 (200.0–450.0)	300.0 (250.0–350.0)	300.0 (300.0–500.0)	300.0 (250.0–450.0)	400.0 (300.0–500.0)	300.0 (300.0–450.0)
Daily levodopa equivalent dose (mg), median (IQR)a	450.0 (300.0–650.0)	400.0 (300.0–600.0)	300.0 (300.0–525.0)	399.5 (300.0–600.0)	399.0 (300.0–550.0)	499.0 (350.0–700.0)	450.0 (300.0–600.0)	300.0 (250.0–500.0)	410.0 (300.0–634.3)	527.5 (300.0–806.3)	550.0 (350.0–720.0)	685.0 (485.0–935.0)	349.5 (200.0–542.0)	350.0 (250.0–400.0)	450.0 (300.0–705.0)	400.0 (300.0–650.0)	550.0 (400.0–800.0)	400.0 (300.0–633.8)
< 300 mg	1106 (14.7)	66 (20.4)	59 (17.3)	9 (17.3)	62 (14.6)	134 (10.1)	91 (10.5)	115 (27.3)	128 (13.9)	77 (9.0)	52 (8.3)	22 (2.5)	53 (26.9)	2 (28.6)	97 (17.3)	101 (22.3)	32 (7.2)	147 (17.4)
300-600 mg	4333 (57.8)	189 (58.5)	228 (66.7)	31 (59.6)	301 (70.7)	768 (57.7)	575 (66.6)	233 (55.3)	545 (59.0)	435 (50.8)	334 (53.3)	349 (39.2)	107 (54.3)	4 (57.1)	288 (51.4)	229 (50.6)	225 (50.3)	478 (56.5)
> 600 mg	2062 (27.5)	68 (21.1)	55 (16.1)	12 (23.1)	63 (14.8)	428 (32.2)	198 (22.9)	73 (17.3)	250 (27.1)	344 (40.2)	241 (38.4)	520 (58.4)	37 (18.8)	1 (14.3)	175 (31.3)	123 (27.2)	190 (42.5)	221 (26.1)
Levodopa filled, n (%)
Levodopa	10 (0.1)	1 (0.3)	0 (0.0)	0 (0.0)	0 (0.0)	1 (0.1)	0 (0.0)	2 (0.5)	1 (0.1)	1 (0.1)	0 (0.0)	1 (0.1)	1 (0.5)	0 (0.0)	0 (0.0)	2 (0.4)	0 (0.0)	3 (0.4)
Levodopa benserazide	2477 (32.6)	120 (36.5)	125 (36.2)	11 (21.2)	120 (28.0)	346 (25.5)	276 (31.8)	147 (34.6)	314 (33.7)	268 (30.6)	217 (34.2)	376 (40.9)	71 (35.5)	4 (57.1)	204 (35.5)	157 (34.2)	154 (34.1)	262 (30.8)
Levodopa carbidopa	4779 (62.8)	197 (59.9)	210 (60.9)	38 (73.1)	287 (66.9)	897 (66.1)	556 (64.1)	253 (59.5)	586 (62.9)	535 (61.1)	426 (67.1)	556 (60.4)	128 (64.0)	3 (42.9)	343 (59.8)	284 (61.9)	267 (59.1)	551 (64.8)
Levodopa carbidopa + Entacapone	648 (8.5)	16 (4.9)	20 (5.8)	5 (9.6)	32 (7.5)	200 (14.7)	71 (8.2)	32 (7.5)	68 (7.3)	143 (16.3)	10 (1.6)	19 (2.1)	4 (2.0)	0 (0.0)	59 (10.3)	37 (8.1)	60 (13.3)	71 (8.4)
Number of anti-PD drugs, mean (SD)	1.9 (1.1)	1.8 (1.1)	1.6 (0.9)	1.7 (0.9)	1.7 (0.9)	2.2 (1.1)	1.8 (1.0)	1.6 (0.9)	1.8 (1.1)	2.1 (1.2)	2.2 (1.1)	2.8 (1.3)	1.8 (1.2)	1.6 (0.8)	2.1 (1.2)	1.9 (1.2)	2.3 (1.1)	1.9 (1.1)
1 drug	3564 (46.9)	180 (54.7)	210 (60.9)	29 (55.8)	240 (55.9)	443 (32.6)	405 (46.7)	265 (62.4)	456 (48.9)	324 (37.0)	207 (32.6)	136 (14.8)	111 (55.5)	4 (57.1)	230 (40.1)	239 (52.1)	111 (24.6)	409 (48.1)
2 drugs	2095 (27.5)	82 (24.9)	84 (24.3)	13 (25.0)	126 (29.4)	435 (32.0)	274 (31.6)	106 (24.9)	276 (29.6)	281 (32.1)	210 (33.1)	265 (28.8)	38 (19.0)	2 (28.6)	157 (27.4)	109 (23.7)	161 (35.6)	227 (26.7)
≥3 drugs	1946 (25.6)	67 (20.4)	51 (14.8)	10 (19.2)	63 (14.7)	480 (35.3)	188 (21.7)	54 (12.7)	200 (21.5)	271 (30.9)	218 (34.3)	519 (56.4)	51 (25.5)	1 (14.3)	187 (32.6)	111 (24.2)	180 (39.8)	214 (25.2)
Anti-PD drugs filled, n (%)
Ergot dopamine agonists	91 (1.2)	4 (1.2)	2 (0.6)	0 (0.0)	1 (0.2)	18 (1.3)	6 (0.7)	6 (1.4)	9 (1.0)	14 (1.6)	4 (0.6)	23 (2.5)	4 (2.0)	0 (0.0)	6 (1.0)	9 (2.0)	9 (2.0)	3 (0.4)
Bromocriptine	11 (0.1)	2 (0.6)	0 (0.0)	0 (0.0)	1 (0.2)	2 (0.1)	1 (0.1)	2 (0.5)	1 (0.1)	1 (0.1)	0 (0.0)	1 (0.1)	0 (0.0)	0 (0.0)	0 (0.0)	3 (0.7)	0 (0.0)	0 (0.0)
Pergolide	47 (0.6)	1 (0.3)	1 (0.3)	0 (0.0)	0 (0.0)	12 (0.9)	3 (0.3)	2 (0.5)	5 (0.5)	7 (0.8)	2 (0.3)	12 (1.3)	2 (1.0)	0 (0.0)	3 (0.5)	4 (0.9)	5 (1.1)	2 (0.2)
Cabergoline	33 (0.4)	1 (0.3)	1 (0.3)	0 (0.0)	0 (0.0)	4 (0.3)	2 (0.2)	2 (0.5)	3 (0.3)	6 (0.7)	2 (0.3)	10 (1.1)	2 (1.0)	0 (0.0)	3 (0.5)	2 (0.4)	4 (0.9)	1 (0.1)
Non-ergot dopamine agonists	4422 (58.1)	329 (100.0)	345 (100.0)	52 (100.0)	429 (100.0)	1358 (100.0)	867 (100.0)	100 (23.5)	311 (33.4)	375 (42.8)	284 (44.7)	535 (58.2)	58 (29.0)	2 (28.6)	207 (36.1)	129 (28.1)	208 (46.0)	276 (32.5)
Pramipexole (immediate-release tablet)	462 (6.1)	329 (100.0)	2 (0.6)	1 (1.9)	4 (0.9)	27 (2.0)	22 (2.5)	15 (3.5)	32 (3.4)	22 (2.5)	37 (5.8)	28 (3.0)	5 (2.5)	1 (14.3)	23 (4.0)	13 (2.8)	10 (2.2)	23 (2.7)
Pramipexole (sustained-release tablet)	772 (10.2)	3 (0.9)	345 (100.0)	0 (0.0)	2 (0.5)	61 (4.5)	53 (6.1)	23 (5.4)	79 (8.5)	71 (8.1)	63 (9.9)	117 (12.7)	11 (5.5)	0 (0.0)	47 (8.2)	21 (4.6)	45 (10.0)	70 (8.2)
Ropinirole (immediate-release tablet)	76 (1.0)	1 (0.3)	1 (0.3)	52 (100.0)	2 (0.5)	6 (0.4)	3 (0.3)	3 (0.7)	7 (0.8)	1 (0.1)	6 (0.9)	10 (1.1)	3 (1.5)	0 (0.0)	4 (0.7)	1 (0.2)	1 (0.2)	1 (0.1)
Ropinirole (sustained-release tablet)	795 (10.5)	7 (2.1)	2 (0.6)	2 (3.8)	429 (100.0)	51 (3.8)	38 (4.4)	21 (4.9)	64 (6.9)	85 (9.7)	60 (9.4)	112 (12.2)	14 (7.0)	0 (0.0)	40 (7.0)	27 (5.9)	52 (11.5)	50 (5.9)
Ropinirole (transdermal patch)	1263 (16.6)	3 (0.9)	4 (1.2)	2 (3.8)	4 (0.9)	1358 (100.0)	2 (0.2)	7 (1.6)	35 (3.8)	71 (8.1)	24 (3.8)	116 (12.6)	9 (4.5)	0 (0.0)	29 (5.1)	28 (6.1)	28 (6.2)	33 (3.9)
Rotigotine (transdermal patch)	1480 (19.5)	21 (6.4)	15 (4.3)	3 (5.8)	14 (3.3)	38 (2.8)	867 (100.0)	38 (8.9)	115 (12.3)	151 (17.2)	117 (18.4)	213 (23.2)	18 (9.0)	1 (14.3)	79 (13.8)	48 (10.5)	85 (18.8)	110 (12.9)
Monoamine oxidase B inhibitors	3167 (41.6)	53 (16.1)	60 (17.4)	9 (17.3)	86 (20.0)	477 (35.1)	191 (22.0)	425 (100.0)	932 (100.0)	876 (100.0)	163 (25.7)	384 (41.7)	30 (15.0)	1 (14.3)	134 (23.3)	80 (17.4)	133 (29.4)	184 (21.6)
Selegiline	1122 (14.8)	25 (7.6)	28 (8.1)	4 (7.7)	45 (10.5)	234 (17.2)	98 (11.3)	425 (100.0)	1 (0.1)	0 (0.0)	100 (15.7)	189 (20.5)	9 (4.5)	0 (0.0)	66 (11.5)	34 (7.4)	60 (13.3)	82 (9.6)
Rasagiline	1299 (17.1)	21 (6.4)	25 (7.2)	4 (7.7)	33 (7.7)	198 (14.6)	82 (9.5)	0 (0.0)	932 (100.0)	2 (0.2)	57 (9.0)	130 (14.1)	18 (9.0)	1 (14.3)	58 (10.1)	30 (6.5)	52 (11.5)	80 (9.4)
Safinamide	748 (9.8)	7 (2.1)	7 (2.0)	1 (1.9)	8 (1.9)	45 (3.3)	11 (1.3)	0 (0.0)	0 (0.0)	876 (100.0)	6 (0.9)	65 (7.1)	3 (1.5)	0 (0.0)	10 (1.7)	16 (3.5)	21 (4.6)	22 (2.6)
Catechol-O-methyltransferase inhibitors	1605 (21.1)	46 (14.0)	32 (9.3)	6 (11.5)	24 (5.6)	169 (12.4)	85 (9.8)	25 (5.9)	77 (8.3)	84 (9.6)	635 (100.0)	920 (100.0)	22 (11.0)	1 (14.3)	58 (10.1)	50 (10.9)	68 (15.0)	73 (8.6)
Entacapone	978 (12.9)	44 (13.4)	25 (7.2)	6 (11.5)	22 (5.1)	143 (10.5)	78 (9.0)	21 (4.9)	60 (6.4)	57 (6.5)	635 (100.0)	13 (1.4)	17 (8.5)	1 (14.3)	49 (8.5)	39 (8.5)	56 (12.4)	62 (7.3)
Opicapone	636 (8.4)	2 (0.6)	7 (2.0)	0 (0.0)	2 (0.5)	26 (1.9)	7 (0.8)	4 (0.9)	17 (1.8)	27 (3.1)	2 (0.3)	920 (100.0)	5 (2.5)	0 (0.0)	9 (1.6)	11 (2.4)	12 (2.7)	11 (1.3)
Anticholinergics	445 (5.9)	9 (2.7)	7 (2.0)	0 (0.0)	19 (4.4)	63 (4.6)	30 (3.5)	16 (3.8)	47 (5.0)	44 (5.0)	22 (3.5)	46 (5.0)	200 (100.0)	7 (100.0)	20 (3.5)	14 (3.1)	16 (3.5)	27 (3.2)
Trihexyphenidyl	430 (5.7)	9 (2.7)	6 (1.7)	0 (0.0)	18 (4.2)	61 (4.5)	29 (3.3)	16 (3.8)	46 (4.9)	43 (4.9)	21 (3.3)	45 (4.9)	200 (100.0)	0 (0.0)	17 (3.0)	14 (3.1)	16 (3.5)	27 (3.2)
Biperiden	15 (0.2)	0 (0.0)	1 (0.3)	0 (0.0)	1 (0.2)	2 (0.1)	1 (0.1)	0 (0.0)	1 (0.1)	1 (0.1)	1 (0.2)	1 (0.1)	0 (0.0)	7 (100.0)	3 (0.5)	0 (0.0)	0 (0.0)	0 (0.0)
Others	3546 (46.6)	84 (25.5)	69 (20.0)	8 (15.4)	102 (23.8)	558 (41.1)	239 (27.6)	69 (16.2)	256 (27.5)	334 (38.1)	207 (32.6)	458 (49.8)	43 (21.5)	0 (0.0)	574 (100.0)	459 (100.0)	452 (100.0)	850 (100.0)
Droxidopa	902 (11.9)	24 (7.3)	21 (6.1)	4 (7.7)	32 (7.5)	127 (9.4)	53 (6.1)	16 (3.8)	61 (6.5)	60 (6.8)	75 (11.8)	92 (10.0)	10 (5.0)	0 (0.0)	574 (100.0)	31 (6.8)	36 (8.0)	59 (6.9)
Amantadine	923 (12.1)	22 (6.7)	19 (5.5)	4 (7.7)	30 (7.0)	119 (8.8)	71 (8.2)	23 (5.4)	80 (8.6)	105 (12.0)	38 (6.0)	127 (13.8)	13 (6.5)	0 (0.0)	49 (8.5)	459 (100.0)	35 (7.7)	58 (6.8)
Istradefylline	981 (12.9)	16 (4.9)	14 (4.1)	4 (7.7)	27 (6.3)	217 (16.0)	63 (7.3)	19 (4.5)	65 (7.0)	121 (13.8)	56 (8.8)	165 (17.9)	8 (4.0)	0 (0.0)	61 (10.6)	30 (6.5)	452 (100.0)	71 (8.4)
Zonisamide	1658 (21.8)	40 (12.2)	31 (9.0)	1 (1.9)	38 (8.9)	274 (20.2)	112 (12.9)	25 (5.9)	109 (11.7)	154 (17.6)	95 (15.0)	249 (27.1)	20 (10.0)	0 (0.0)	81 (14.1)	53 (11.5)	89 (19.7)	850 (100.0)
Number of concomitant drugs other than anti-PD drugs, mean (SD)	5.2 (3.1)	5.1 (3.4)	4.9 (2.9)	5.5 (3.4)	5.0 (3.2)	5.5 (3.1)	5.3 (3.1)	4.4 (2.8)	4.7 (3.0)	5.2 (3.0)	5.0 (3.1)	5.2 (3.1)	4.8 (3.5)	3.6 (2.9)	6.0 (3.1)	5.2 (3.2)	5.6 (3.3)	5.9 (3.1)
Charlson Comorbidity Index, mean (SD)	2.0 (1.9)	2.1 (1.8)	1.9 (1.8)	2.7 (1.9)	1.9 (1.9)	1.9 (1.9)	2.1 (2.0)	1.7 (1.7)	1.8 (1.8)	1.8 (1.8)	2.1 (1.9)	1.8 (1.8)	1.9 (1.9)	2.1 (2.3)	2.1 (1.8)	2.1 (1.9)	2.0 (1.9)	1.9 (1.8)
Comorbidities, n (%)
Depression	1087 (14.3)	53 (16.1)	59 (17.1)	7 (13.5)	55 (12.8)	208 (15.3)	117 (13.5)	45 (10.6)	99 (10.6)	111 (12.7)	108 (17.0)	148 (16.1)	30 (15.0)	1 (14.3)	87 (15.2)	90 (19.6)	69 (15.3)	121 (14.2)
Insomnia	2951 (38.8)	151 (45.9)	133 (38.6)	28 (53.8)	156 (36.4)	569 (41.9)	335 (38.6)	153 (36.0)	313 (33.6)	368 (42.0)	282 (44.4)	407 (44.2)	73 (36.5)	2 (28.6)	235 (40.9)	189 (41.2)	166 (36.7)	306 (36.0)
Dementia	1478 (19.4)	72 (21.9)	43 (12.5)	13 (25.0)	69 (16.1)	258 (19.0)	184 (21.2)	79 (18.6)	124 (13.3)	140 (16.0)	140 (22.0)	154 (16.7)	31 (15.5)	1 (14.3)	158 (27.5)	118 (25.7)	88 (19.5)	200 (23.5)
Type 2 diabetes	2531 (33.3)	119 (36.2)	125 (36.2)	19 (36.5)	150 (35.0)	475 (35.0)	293 (33.8)	122 (28.7)	298 (32.0)	300 (34.2)	209 (32.9)	289 (31.4)	70 (35.0)	3 (42.9)	170 (29.6)	160 (34.9)	158 (35.0)	291 (34.2)
Hypertension	4428 (58.2)	205 (62.3)	208 (60.3)	35 (67.3)	256 (59.7)	756 (55.7)	521 (60.1)	252 (59.3)	528 (56.7)	495 (56.5)	374 (58.9)	468 (50.9)	122 (61.0)	3 (42.9)	303 (52.8)	291 (63.4)	259 (57.3)	486 (57.2)
Liver failure	1185 (15.6)	54 (16.4)	57 (16.5)	8 (15.4)	71 (16.6)	212 (15.6)	149 (17.2)	65 (15.3)	145 (15.6)	140 (16.0)	100 (15.7)	126 (13.7)	31 (15.5)	3 (42.9)	75 (13.1)	76 (16.6)	56 (12.4)	129 (15.2)
Renal failure	424 (5.6)	19 (5.8)	16 (4.6)	7 (13.5)	22 (5.1)	74 (5.4)	63 (7.3)	20 (4.7)	43 (4.6)	50 (5.7)	37 (5.8)	40 (4.3)	10 (5.0)	2 (28.6)	36 (6.3)	25 (5.4)	26 (5.8)	43 (5.1)
Constipation	5650 (74.3)	255 (77.5)	264 (76.5)	39 (75.0)	292 (68.1)	1060 (78.1)	680 (78.4)	292 (68.7)	650 (69.7)	653 (74.5)	505 (79.5)	736 (80.0)	118 (59.0)	4 (57.1)	443 (77.2)	334 (72.8)	340 (75.2)	608 (71.5)
Pain	2695 (35.4)	130 (39.5)	123 (35.7)	16 (30.8)	168 (39.2)	525 (38.7)	296 (34.1)	138 (32.5)	323 (34.7)	313 (35.7)	222 (35.0)	335 (36.4)	74 (37.0)	1 (14.3)	183 (31.9)	173 (37.7)	166 (36.7)	294 (34.6)
Hospital size, n (%)
<20 beds	74 (5.7)	5 (4.0)	7 (13.2)	2 (10.0)	4 (4.3)	10 (4.9)	7 (3.3)	8 (17.0)	2 (1.4)	9 (8.0)	3 (1.5)	17 (11.6)	2 (8.7)	0 (0.0)	6 (5.1)	3 (3.5)	2 (3.6)	2 (1.7)
20–99 beds	60 (4.6)	12 (9.5)	2 (3.8)	2 (10.0)	2 (2.1)	5 (2.4)	12 (5.7)	1 (2.1)	10 (6.8)	0 (0.0)	10 (4.9)	3 (2.0)	2 (8.7)	0 (0.0)	4 (3.4)	11 (12.8)	0 (0.0)	5 (4.2)
100–199 beds	228 (17.4)	41 (32.5)	3 (5.7)	5 (25.0)	19 (20.2)	36 (17.5)	32 (15.3)	7 (14.9)	24 (16.4)	22 (19.6)	29 (14.3)	24 (16.3)	5 (21.7)	1 (100.0)	17 (14.5)	17 (19.8)	7 (12.5)	23 (19.5)
200–299 beds	108 (8.3)	20 (15.9)	2 (3.8)	3 (15.0)	4 (4.3)	14 (6.8)	16 (7.7)	3 (6.4)	9 (6.2)	1 (0.9)	36 (17.7)	5 (3.4)	1 (4.3)	0 (0.0)	11 (9.4)	7 (8.1)	2 (3.6)	10 (8.5)
300–499 beds	300 (22.9)	24 (19.0)	20 (37.7)	7 (35.0)	29 (30.9)	36 (17.5)	47 (22.5)	6 (12.8)	48 (32.9)	30 (26.8)	57 (28.1)	17 (11.6)	3 (13.0)	0 (0.0)	34 (29.1)	13 (15.1)	17 (30.4)	19 (16.1)
≥500 beds	538 (41.1)	24 (19.0)	19 (35.8)	1 (5.0)	36 (38.3)	105 (51.0)	95 (45.5)	22 (46.8)	53 (36.3)	50 (44.6)	68 (33.5)	81 (55.1)	10 (43.5)	0 (0.0)	45 (38.5)	35 (40.7)	28 (50.0)	59 (50.0)
missing	6297 (82.8)	203 (61.7)	292 (84.6)	32 (61.5)	335 (78.1)	1152 (84.8)	658 (75.9)	378 (88.9)	786 (84.3)	764 (87.2)	432 (68.0)	773 (84.0)	177 (88.5)	6 (85.7)	457 (79.6)	373 (81.3)	396 (87.6)	732 (86.1)
Deep brain stimulation, n (%)	98 (1.3)	5 (1.5)	3 (0.9)	0 (0.0)	3 (0.7)	26 (1.9)	3 (0.3)	4 (0.9)	9 (1.0)	20 (2.3)	8 (1.3)	26 (2.8)	3 (1.5)	0 (0.0)	13 (2.3)	5 (1.1)	5 (1.1)	4 (0.5)
Levodopa injection, n (%)	6 (0.1)	1 (0.3)	0 (0.0)	0 (0.0)	0 (0.0)	2 (0.1)	0 (0.0)	0 (0.0)	0 (0.0)	0 (0.0)	0 (0.0)	3 (0.3)	0 (0.0)	0 (0.0)	1 (0.2)	1 (0.2)	0 (0.0)	0 (0.0)
Patients with no records of levodopa injection and deep brain stimulation, n (%)	7501 (98.6)	323 (98.2)	342 (99.1)	52 (100.0)	426 (99.3)	1330 (97.9)	864 (99.7)	421 (99.1)	923 (99.0)	856 (97.7)	627 (98.7)	891 (96.8)	197 (98.5)	7 (100.0)	560 (97.6)	453 (98.7)	447 (98.9)	846 (99.5)
Hospitalization in persistent treatment period, n (%)	1172 (15.4)	123 (37.4)	45 (13.0)	16 (30.8)	81 (18.9)	149 (11.0)	199 (23.0)	54 (12.7)	110 (11.8)	83 (9.5)	207 (32.6)	95 (10.3)	22 (11.0)	2 (28.6)	142 (24.7)	89 (19.4)	54 (11.9)	111 (13.1)
Claims of management fee for intractable diseases in persistent treatment period, n (%)	4697 (61.8)	132 (40.1)	195 (56.5)	20 (38.5)	260 (60.6)	1001 (73.7)	494 (57.0)	244 (57.4)	591 (63.4)	665 (75.9)	341 (53.7)	730 (79.3)	84 (42.0)	3 (42.9)	313 (54.5)	208 (45.3)	338 (74.8)	571 (67.2)
a Daily levodopa dose and daily levodopa equivalent dose were calculated for patients with no records of levodopa injection and deep brain stimulation in the baseline period. Daily levodopa equivalent dose was calculated excluding index anti-PD drugs newly filled at the cohort entry date in each cohort.
Abbreviations: IQR, interquartile range; PD, Parkinson’s disease; SD, standard deviation.

## Sheet: Supplementary Table 4
Supplementary Table 4. Study population in each cohort
	Pramipexole (immediate-release tablet)	Pramipexole (sustained-release tablet)	Ropinirole (immediate-release tablet)	Ropinirole (sustained-release tablet)	Ropinirole (transdermal patch)	Rotigotine (transdermal patch)	Selegiline	Rasagiline	Safinamide	Entacapone	Opicapone	Trihexyphenidyl	Biperiden	Droxidopa	Amantadine	Istradefylline	Zonisamide
First filling of target anti-PD drug at day 0	2018	1162	260	1240	2752	3505	1414	2030	1530	1584	1718	2800	4198	2255	2707	1157	2055
Age ≥40 years at day 0	1934	1142	256	1218	2690	3400	1393	2004	1497	1558	1702	2539	3483	2223	2668	1140	2027
PD diagnosis in same month at day 0	1679	1123	250	1196	2663	3237	1375	1983	1486	1527	1688	2321	2987	2030	2385	1127	1998
Look-back period ≥180 days and follow-up period ≥365 days	1051	610	137	703	1949	1766	736	1314	1110	907	1175	1223	1401	1261	1381	667	1253
Levodopa filled at day 0 and look-back period	424	412	71	505	1608	1020	490	1066	1015	776	1088	279	17	784	596	539	1011
No diagnosis of diseases to be differentiated (study population)	329	345	52	429	1358	867	425	932	876	635	920	200	7	574	459	452	850
Abbreviation: PD, Parkinson’s disease.
* The numbers in each row represent the number of patients when the corresponding conditions are applied sequentially from top to bottom.

## Sheet: Supplementary Table 5
Supplementary Table 5. Subgroup analysis of persistence of anti-PD drug treatment
Treatment	Age <75 years				Age ≥75 years				Male				Female				Hospitalization in follow-up period				No hospitalization in follow-up period				Daily levodopa dosage <400 mg				Daily levodopa dosage ≥400 mg				No concomitant use of anti-PD drugs other than levodopa				Concomitant use of anti-PD drugs other than levodopa				With intractable diseases claims				Without intractable disease claims				With depression
	n	Persistent patients, n (%)	Persistent treatment period (days), median (IQR)		n	Persistent patients, n (%)	Persistent treatment period (days), median (IQR)		n	Persistent patients, n (%)	Persistent treatment period (days), median (IQR)		n	Persistent patients, n (%)	Persistent treatment period (days), median (IQR)		n	Persistent patients, n (%)	Persistent treatment period (days), median (IQR)		n	Persistent patients, n (%)	Persistent treatment period (days), median (IQR)		n	Persistent patients, n (%)	Persistent treatment period (days), median (IQR)		n	Persistent patients, n (%)	Persistent treatment period (days), median (IQR)		n	Persistent patients, n (%)	Persistent treatment period (days), median (IQR)		n	Persistent patients, n (%)	Persistent treatment period (days), median (IQR)		n	Persistent patients, n (%)	Persistent treatment period (days), median (IQR)		n	Persistent patients, n (%)	Persistent treatment period (days), median (IQR)		n
All drugs	2314	1056 (45.6)	284.5 (63.0–365.0)		5291	2354 (44.5)	264.0 (56.0–365.0)		3318	1548 (46.7)	301.0 (63.0–365.0)		4287	1862 (43.4)	245.0 (56.0–365.0)		1172	404 (34.5)	189.0 (30.0–365.0)		6433	3006 (46.7)	294.0 (60.0–365.0)		4102	1967 (48.0)	323.0 (63.0–365.0)		3399	1402 (41.2)	216.0 (56.0–365.0)		3564	1822 (51.1)	365.0 (63.0–365.0)		4041	1588 (39.3)	203.0 (56.0–365.0)		4697	2366 (50.4)	365.0 (84.0–365.0)		2908	1044 (35.9)	126.0 (35.0–365.0)		1087
Non-ergot dopamine agonists
Pramipexole (immediate-release tablet)	71	27 (38.0)	112.0 (30.0–365.0)		258	101 (39.1)	127.0 (28.0–365.0)		128	59 (46.1)	320.0 (33.0–365.0)		201	69 (34.3)	91.0 (28.0–365.0)		123	24 (19.5)	28.0 (14.0–184.5)		206	104 (50.5)	365.0 (64.8–365.0)		200	81 (40.5)	203.0 (30.0–365.0)		123	45 (36.6)	70.0 (24.0–365.0)		180	82 (45.6)	307.0 (34.8–365.0)		149	46 (30.9)	63.0 (19.0–365.0)		132	63 (47.7)	324.5 (56.0–365.0)		197	65 (33.0)	63.0 (18.0–365.0)		53
Pramipexole (sustained-release tablet)	117	75 (64.1)	365.0 (227.0–365.0)		228	111 (48.7)	343.0 (63.0–365.0)		139	68 (48.9)	355.0 (94.0–365.0)		206	118 (57.3)	365.0 (91.3–365.0)		45	18 (40.0)	333.0 (68.0–365.0)		300	168 (56.0)	365.0 (98.0–365.0)		221	125 (56.6)	365.0 (98.0–365.0)		121	59 (48.8)	343.0 (77.0–365.0)		210	110 (52.4)	365.0 (77.0–365.0)		135	76 (56.3)	365.0 (129.5–365.0)		195	123 (63.1)	365.0 (168.0–365.0)		150	63 (42.0)	234.0 (49.0–365.0)		59
Ropinirole (immediate-release tablet)	10	4 (40.0)	195.5 (60.3–365.0)		42	13 (31.0)	68.0 (21.3–365.0)		17	7 (41.2)	154.0 (42.0–365.0)		35	10 (28.6)	76.0 (28.0–365.0)		16	2 (12.5)	28.5 (13.0–45.3)		36	15 (41.7)	195.5 (49.0–365.0)		30	12 (40.0)	86.0 (28.0–365.0)		22	5 (22.7)	52.0 (29.3–269.3)		29	12 (41.4)	119.0 (46.0–365.0)		23	5 (21.7)	41.0 (23.0–258.5)		20	8 (40.0)	144.0 (72.3–365.0)		32	9 (28.1)	41.5 (17.0–365.0)		7
Ropinirole (sustained-release tablet)	129	73 (56.6)	365.0 (119.0–365.0)		300	137 (45.7)	290.0 (58.3–365.0)		206	104 (50.5)	365.0 (84.3–365.0)		223	106 (47.5)	315.0 (61.0–365.0)		81	22 (27.2)	90.0 (26.0–365.0)		348	188 (54.0)	365.0 (91.0–365.0)		265	127 (47.9)	329.0 (84.0–365.0)		161	83 (51.6)	365.0 (56.0–365.0)		240	119 (49.6)	359.5 (78.5–365.0)		189	91 (48.1)	315.0 (63.0–365.0)		260	150 (57.7)	365.0 (129.0–365.0)		169	60 (35.5)	112.0 (35.0–365.0)		55
Ropinirole (transdermal patch)	449	242 (53.9)	365.0 (86.0–365.0)		909	490 (53.9)	365.0 (91.0–365.0)		548	285 (52.0)	365.0 (83.5–365.0)		810	447 (55.2)	365.0 (91.5–365.0)		149	73 (49.0)	357.0 (112.0–365.0)		1209	659 (54.5)	365.0 (86.0–365.0)		645	337 (52.2)	365.0 (84.0–365.0)		685	381 (55.6)	365.0 (91.0–365.0)		443	228 (51.5)	365.0 (84.0–365.0)		915	504 (55.1)	365.0 (91.0–365.0)		1001	585 (58.4)	365.0 (120.0–365.0)		357	147 (41.2)	245.0 (41.0–365.0)		208
Rotigotine (transdermal patch)	199	87 (43.7)	260.0 (56.0–365.0)		668	276 (41.3)	215.5 (56.0–365.0)		385	160 (41.6)	222.0 (56.0–365.0)		482	203 (42.1)	231.0 (50.5–365.0)		199	92 (46.2)	295.0 (70.0–365.0)		668	271 (40.6)	196.5 (56.0–365.0)		439	177 (40.3)	203.0 (56.0–365.0)		425	185 (43.5)	271.0 (56.0–365.0)		405	178 (44.0)	237.0 (56.0–365.0)		462	185 (40.0)	212.0 (56.0–365.0)		494	237 (48.0)	322.0 (90.0–365.0)		373	126 (33.8)	101.0 (35.0–365.0)		117
Monoamine oxidase B inhibitors
Selegiline	142	73 (51.4)	365.0 (67.0–365.0)		283	137 (48.4)	321.0 (56.0–365.0)		183	107 (58.5)	365.0 (94.5–365.0)		242	103 (42.6)	231.5 (51.5–365.0)		54	21 (38.9)	212.0 (36.3–365.0)		371	189 (50.9)	365.0 (63.0–365.0)		284	146 (51.4)	365.0 (70.8–365.0)		137	62 (45.3)	284.0 (49.0–365.0)		265	136 (51.3)	365.0 (63.0–365.0)		160	74 (46.3)	279.5 (56.0–365.0)		244	137 (56.1)	365.0 (84.0–365.0)		181	73 (40.3)	179.0 (49.0–365.0)		45
Rasagiline	321	179 (55.8)	365.0 (77.0–365.0)		611	305 (49.9)	346.0 (63.0–365.0)		422	241 (57.1)	365.0 (74.0–365.0)		510	243 (47.6)	296.0 (63.0–365.0)		110	49 (44.5)	298.5 (76.8–365.0)		822	435 (52.9)	365.0 (63.0–365.0)		535	295 (55.1)	365.0 (63.0–365.0)		388	183 (47.2)	299.5 (63.0–365.0)		456	247 (54.2)	365.0 (64.5–365.0)		476	237 (49.8)	364.0 (63.0–365.0)		591	360 (60.9)	365.0 (112.5–365.0)		341	124 (36.4)	106.0 (35.0–365.0)		99
Safinamide	310	182 (58.7)	365.0 (112.3–365.0)		566	307 (54.2)	365.0 (63.0–365.0)		378	221 (58.5)	365.0 (84.0–365.0)		498	268 (53.8)	365.0 (77.0–365.0)		83	50 (60.2)	365.0 (209.5–365.0)		793	439 (55.4)	365.0 (64.0–365.0)		400	245 (61.3)	365.0 (90.8–365.0)		456	234 (51.3)	365.0 (64.0–365.0)		324	174 (53.7)	365.0 (56.0–365.0)		552	315 (57.1)	365.0 (91.0–365.0)		665	395 (59.4)	365.0 (98.0–365.0)		211	94 (44.5)	255.0 (42.0–365.0)		111
Catechol-O-methyltransferase inhibitors
Entacapone	202	72 (35.6)	168.0 (35.0–365.0)		433	162 (37.4)	140.0 (35.0–365.0)		261	106 (40.6)	193.0 (35.0–365.0)		374	128 (34.2)	119.0 (35.0–365.0)		207	52 (25.1)	54.0 (14.0–362.5)		428	182 (42.5)	238.0 (56.0–365.0)		273	100 (36.6)	150.0 (37.0–365.0)		354	131 (37.0)	168.0 (35.0–365.0)		207	75 (36.2)	168.0 (41.0–365.0)		428	159 (37.1)	143.5 (35.0–365.0)		341	148 (43.4)	278.0 (70.0–365.0)		294	86 (29.3)	56.0 (20.0–365.0)		108
Opicapone	406	221 (54.4)	365.0 (70.0–365.0)		514	264 (51.4)	365.0 (55.3–365.0)		338	178 (52.7)	365.0 (56.3–365.0)		582	307 (52.7)	365.0 (60.0–365.0)		95	60 (63.2)	365.0 (178.5–365.0)		825	425 (51.5)	365.0 (56.0–365.0)		277	163 (58.8)	365.0 (84.0–365.0)		614	309 (50.3)	365.0 (56.0–365.0)		136	61 (44.9)	264.5 (43.5–365.0)		784	424 (54.1)	365.0 (63.0–365.0)		730	421 (57.7)	365.0 (84.0–365.0)		190	64 (33.7)	75.0 (28.0–365.0)		148
Anticholinergics
Trihexyphenidyl	82	48 (58.5)	365.0 (56.0–365.0)		118	27 (22.9)	78.5 (32.5–339.3)		86	30 (34.9)	140.5 (42.0–365.0)		114	45 (39.5)	143.5 (35.0–365.0)		22	10 (45.5)	306.0 (71.3–365.0)		178	65 (36.5)	127.0 (35.0–365.0)		142	56 (39.4)	126.0 (34.3–365.0)		55	18 (32.7)	168.0 (58.0–365.0)		111	48 (43.2)	189.0 (38.5–365.0)		89	27 (30.3)	91.0 (30.0–365.0)		84	38 (45.2)	265.5 (56.0–365.0)		116	37 (31.9)	83.0 (29.8–365.0)		30
Biperiden	3	1 (33.3)	161.0 (94.5–263.0)		4	1 (25.0)	65.0 (43.8–152.0)		2	0 (0.0)	38.5 (33.3–43.8)		5	2 (40.0)	161.0 (81.0–365.0)		2	1 (50.0)	223.0 (152.0–294.0)		5	1 (20.0)	49.0 (28.0–161.0)		5	1 (20.0)	49.0 (28.0–81.0)		2	1 (50.0)	263.0 (212.0–314.0)		4	2 (50.0)	223.0 (73.0–365.0)		3	0 (0.0)	28.0 (28.0–94.5)		3	0 (0.0)	28.0 (28.0–94.5)		4	2 (50.0)	223.0 (73.0–365.0)		1
Others
Droxidopa	127	75 (59.1)	365.0 (113.5–365.0)		447	244 (54.6)	365.0 (79.0–365.0)		313	170 (54.3)	365.0 (84.0–365.0)		261	149 (57.1)	365.0 (84.0–365.0)		142	65 (45.8)	318.5 (68.0–365.0)		432	254 (58.8)	365.0 (90.0–365.0)		293	168 (57.3)	365.0 (90.0–365.0)		267	143 (53.6)	365.0 (77.5–365.0)		230	125 (54.3)	365.0 (63.0–365.0)		344	194 (56.4)	365.0 (99.5–365.0)		313	202 (64.5)	365.0 (161.0–365.0)		261	117 (44.8)	276.0 (50.0–365.0)		87
Amantadine	122	75 (61.5)	365.0 (90.5–365.0)		337	159 (47.2)	301.0 (57.0–365.0)		192	106 (55.2)	365.0 (84.0–365.0)		267	128 (47.9)	287.0 (54.0–365.0)		89	35 (39.3)	222.0 (44.0–365.0)		370	199 (53.8)	365.0 (63.3–365.0)		260	132 (50.8)	365.0 (63.0–365.0)		193	98 (50.8)	365.0 (60.0–365.0)		239	119 (49.8)	363.0 (62.0–365.0)		220	115 (52.3)	365.0 (63.0–365.0)		208	127 (61.1)	365.0 (117.0–365.0)		251	107 (42.6)	189.0 (49.0–365.0)		90
Istradefylline	127	58 (45.7)	308.0 (80.0–365.0)		325	165 (50.8)	365.0 (63.0–365.0)		201	102 (50.7)	365.0 (90.0–365.0)		251	121 (48.2)	352.0 (58.5–365.0)		54	27 (50.0)	362.0 (150.8–365.0)		398	196 (49.2)	363.0 (63.0–365.0)		206	103 (50.0)	364.5 (70.0–365.0)		241	117 (48.5)	350.0 (63.0–365.0)		111	45 (40.5)	189.0 (56.0–365.0)		341	178 (52.2)	365.0 (77.0–365.0)		338	186 (55.0)	365.0 (98.0–365.0)		114	37 (32.5)	106.0 (49.0–365.0)		69
Zonisamide	236	133 (56.4)	365.0 (91.8–365.0)		614	373 (60.7)	365.0 (105.3–365.0)		399	231 (57.9)	365.0 (94.0–365.0)		451	275 (61.0)	365.0 (111.0–365.0)		111	63 (56.8)	365.0 (201.5–365.0)		739	443 (59.9)	365.0 (89.5–365.0)		513	302 (58.9)	365.0 (98.0–365.0)		333	201 (60.4)	365.0 (106.0–365.0)		409	236 (57.7)	365.0 (84.0–365.0)		441	270 (61.2)	365.0 (126.0–365.0)		571	363 (63.6)	365.0 (142.0–365.0)		279	143 (51.3)	365.0 (63.0–365.0)		121
Abbreviation: IQR, interquartile range; PD, Parkinson’s disease.
[truncated: 17 more columns]

## Sheet: Supplementary Table 6
Supplementary Table 6. Subgroup analysis of adherence to anti-PD drugs
Treatment	Age <75 years				Age ≥75 years				Male				Female				Hospitalization in follow-up period				No hospitalization in follow-up period				Daily levodopa dosage <400 mg				Daily levodopa dosage ≥400 mg				No concomitant use of anti-PD drugs other than levodopa				Concomitant use of anti-PD drugs other than levodopa				With intractable diseases claims				Without intractable disease claims				With depression
	n	PDC ≥80%, n (%)	PDC, %, median (IQR)		n	PDC ≥80%, n (%)	PDC, %, median (IQR)		n	PDC ≥80%, n (%)	PDC, %, median (IQR)		n	PDC ≥80%, n (%)	PDC, %, median (IQR)		n	PDC ≥80%, n (%)	PDC, %, median (IQR)		n	PDC ≥80%, n (%)	PDC, %, median (IQR)		n	PDC ≥80%, n (%)	PDC, %, median (IQR)		n	PDC ≥80%, n (%)	PDC, %, median (IQR)		n	PDC ≥80%, n (%)	PDC, %, median (IQR)		n	PDC ≥80%, n (%)	PDC, %, median (IQR)		n	PDC ≥80%, n (%)	PDC, %, median (IQR)		n	PDC ≥80%, n (%)	PDC, %, median (IQR)		n
All drugs	1633	1580 (96.8)	100.0 (96.2–100.0)		3685	3572 (96.9)	99.7 (96.0–100.0)		2392	2313 (96.7)	99.7 (95.9–100.0)		2926	2839 (97.0)	99.7 (96.1–100.0)		997	890 (89.3)	96.9 (91.2–100.0)		4321	4262 (98.6)	100.0 (97.2–100.0)		2950	2871 (97.3)	99.7 (96.2–100.0)		2296	2212 (96.3)	99.6 (95.9–100.0)		2558	2496 (97.6)	99.7 (96.5–100.0)		2760	2656 (96.2)	99.7 (95.7–100.0)		3457	3403 (98.4)	99.7 (96.2–100.0)		1861	1749 (94.0)	99.7 (95.7–100.0)		736
Non-ergot dopamine agonists
Pramipexole (immediate-release tablet)	46	42 (91.3)	99.2 (94.1–100.0)		181	165 (91.2)	98.9 (94.2–100.0)		99	94 (94.9)	99.3 (95.9–100.0)		128	113 (88.3)	98.6 (92.9–100.0)		87	67 (77.0)	98.1 (81.2–100.0)		140	140 (100.0)	99.2 (96.5–100.0)		142	131 (92.3)	98.9 (94.0–100.0)		79	71 (89.9)	99.1 (94.6–100.0)		127	120 (94.5)	98.7 (95.9–100.0)		100	87 (87.0)	99.2 (91.9–100.0)		91	89 (97.8)	99.2 (95.9–100.0)		136	118 (86.8)	98.9 (92.6–100.0)		35
Pramipexole (sustained-release tablet)	101	96 (95.0)	99.7 (95.9–100.0)		161	153 (95.0)	99.7 (96.8–100.0)		105	99 (94.3)	99.4 (96.4–100.0)		157	150 (95.5)	100.0 (96.6–100.0)		37	32 (86.5)	95.3 (90.9–98.3)		225	217 (96.4)	100.0 (97.4–100.0)		168	159 (94.6)	100.0 (96.6–100.0)		92	88 (95.7)	99.4 (96.4–100.0)		155	149 (96.1)	100.0 (96.9–100.0)		107	100 (93.5)	99.4 (96.3–100.0)		160	154 (96.3)	100.0 (96.9–100.0)		102	95 (93.1)	99.4 (95.6–100.0)		43
Ropinirole (immediate-release tablet)	7	7 (100.0)	100.0 (98.4–100.0)		23	20 (87.0)	98.9 (93.7–100.0)		10	9 (90.0)	98.2 (94.5–99.7)		20	18 (90.0)	100.0 (95.4–100.0)		7	5 (71.4)	96.2 (85.3–100.0)		23	22 (95.7)	98.9 (96.6–100.0)		17	16 (94.1)	98.9 (93.9–100.0)		13	11 (84.6)	98.9 (98.0–100.0)		17	17 (100.0)	98.9 (95.1–100.0)		13	10 (76.9)	100.0 (96.2–100.0)		13	12 (92.3)	100.0 (95.5–100.0)		17	15 (88.2)	98.9 (93.9–100.0)		4
Ropinirole (sustained-release tablet)	104	103 (99.0)	100.0 (97.7–100.0)		221	210 (95.0)	99.7 (97.6–100.0)		161	153 (95.0)	100.0 (97.6–100.0)		164	160 (97.6)	100.0 (97.7–100.0)		71	62 (87.3)	98.4 (90.0–100.0)		254	251 (98.8)	100.0 (98.1–100.0)		202	196 (97.0)	100.0 (97.9–100.0)		122	116 (95.1)	99.7 (97.2–100.0)		182	177 (97.3)	100.0 (97.7–100.0)		143	136 (95.1)	99.7 (97.2–100.0)		207	203 (98.1)	99.7 (97.2–100.0)		118	110 (93.2)	100.0 (97.9–100.0)		39
Ropinirole (transdermal patch)	329	323 (98.2)	100.0 (97.8–100.0)		686	684 (99.7)	99.7 (97.2–100.0)		399	396 (99.2)	100.0 (97.2–100.0)		616	611 (99.2)	100.0 (97.5–100.0)		135	135 (100.0)	99.4 (94.6–100.0)		880	872 (99.1)	100.0 (97.8–100.0)		478	475 (99.4)	99.9 (96.2–100.0)		514	509 (99.0)	100.0 (97.9–100.0)		330	328 (99.4)	99.7 (96.9–100.0)		685	679 (99.1)	100.0 (97.7–100.0)		775	770 (99.4)	100.0 (97.3–100.0)		240	237 (98.8)	100.0 (97.5–100.0)		150
Rotigotine (transdermal patch)	131	129 (98.5)	100.0 (96.2–100.0)		454	448 (98.7)	99.7 (96.7–100.0)		269	265 (98.5)	100.0 (97.4–100.0)		316	312 (98.7)	99.6 (96.4–100.0)		180	178 (98.9)	98.7 (95.3–100.0)		405	399 (98.5)	100.0 (97.7–100.0)		289	283 (97.9)	99.7 (96.4–100.0)		295	293 (99.3)	99.7 (96.9–100.0)		280	273 (97.5)	99.6 (96.6–100.0)		305	304 (99.7)	100.0 (96.8–100.0)		354	354 (100.0)	100.0 (97.1–100.0)		231	223 (96.5)	99.6 (95.9–100.0)		76
Monoamine oxidase B inhibitors
Selegiline	101	98 (97.0)	100.0 (97.0–100.0)		203	201 (99.0)	99.4 (95.8–100.0)		146	143 (97.9)	99.4 (95.5–100.0)		158	156 (98.7)	99.9 (96.9–100.0)		43	40 (93.0)	98.3 (96.6–100.0)		261	259 (99.2)	99.7 (96.1–100.0)		208	206 (99.0)	100.0 (96.9–100.0)		93	90 (96.8)	98.8 (95.2–100.0)		192	187 (97.4)	99.7 (95.7–100.0)		112	112 (100.0)	99.4 (97.1–100.0)		184	182 (98.9)	99.5 (95.4–100.0)		120	117 (97.5)	99.7 (97.0–100.0)		26
Rasagiline	229	225 (98.3)	100.0 (97.9–100.0)		426	419 (98.4)	100.0 (97.5–100.0)		307	301 (98.0)	100.0 (97.2–100.0)		348	343 (98.6)	100.0 (97.9–100.0)		102	94 (92.2)	97.6 (93.0–100.0)		553	550 (99.5)	100.0 (98.4–100.0)		383	379 (99.0)	100.0 (97.5–100.0)		266	259 (97.4)	100.0 (97.9–100.0)		327	321 (98.2)	100.0 (97.5–100.0)		328	323 (98.5)	100.0 (97.7–100.0)		458	454 (99.1)	100.0 (97.9–100.0)		197	190 (96.4)	100.0 (96.8–100.0)		70
Safinamide	246	240 (97.6)	99.7 (97.0–100.0)		396	390 (98.5)	99.7 (95.8–100.0)		283	276 (97.5)	99.4 (95.8–100.0)		359	354 (98.6)	99.7 (96.9–100.0)		82	76 (92.7)	97.4 (93.6–100.0)		560	554 (98.9)	99.7 (96.5–100.0)		299	294 (98.3)	99.6 (96.1–100.0)		325	320 (98.5)	99.7 (96.3–100.0)		217	216 (99.5)	99.7 (95.7–100.0)		425	414 (97.4)	99.7 (96.3–100.0)		506	500 (98.8)	99.6 (95.9–100.0)		136	130 (95.6)	99.7 (96.6–100.0)		80
Catechol-O-methyltransferase inhibitors
Entacapone	134	123 (91.8)	100.0 (96.7–100.0)		287	261 (90.9)	99.7 (94.6–100.0)		180	167 (92.8)	99.1 (94.9–100.0)		241	217 (90.0)	100.0 (95.5–100.0)		165	129 (78.2)	97.7 (86.8–100.0)		256	255 (99.6)	100.0 (97.6–100.0)		189	172 (91.0)	100.0 (95.0–100.0)		226	206 (91.2)	99.7 (95.1–100.0)		148	133 (89.9)	99.7 (94.5–100.0)		273	251 (91.9)	99.7 (95.5–100.0)		229	224 (97.8)	100.0 (96.0–100.0)		192	160 (83.3)	99.7 (93.1–100.0)		74
Opicapone	301	291 (96.7)	99.0 (95.0–100.0)		355	341 (96.1)	99.3 (95.7–100.0)		244	237 (97.1)	99.7 (95.5–100.0)		412	395 (95.9)	99.1 (95.5–100.0)		91	85 (93.4)	95.3 (92.0–99.4)		565	547 (96.8)	99.5 (96.1–100.0)		216	206 (95.4)	99.3 (95.3–100.0)		422	409 (96.9)	99.0 (95.5–100.0)		90	85 (94.4)	99.5 (94.9–100.0)		566	547 (96.6)	99.2 (95.6–100.0)		546	533 (97.6)	99.4 (95.8–100.0)		110	99 (90.0)	98.0 (93.7–100.0)		107
Anticholinergics
Trihexyphenidyl	55	54 (98.2)	99.7 (96.4–100.0)		64	62 (96.9)	99.3 (94.0–100.0)		48	47 (97.9)	100.0 (96.1–100.0)		71	69 (97.2)	98.8 (94.6–100.0)		20	19 (95.0)	95.5 (90.8–99.5)		99	97 (98.0)	100.0 (96.4–100.0)		82	81 (98.8)	99.1 (94.9–100.0)		36	34 (94.4)	99.7 (94.9–100.0)		70	68 (97.1)	99.1 (94.0–100.0)		49	48 (98.0)	99.4 (96.6–100.0)		56	55 (98.2)	99.1 (96.1–100.0)		63	61 (96.8)	99.4 (94.9–100.0)		16
Biperiden	2	2 (100.0)	98.5 (97.7–99.2)		2	2 (100.0)	98.6 (97.9–99.3)						4	4 (100.0)	98.6 (97.1–100.0)		2	2 (100.0)	98.6 (97.9–99.3)		2	2 (100.0)	98.5 (97.7–99.2)		2	2 (100.0)	98.5 (97.7–99.2)		2	2 (100.0)	98.6 (97.9–99.3)		3	3 (100.0)	97.2 (97.1–98.6)		1	1 (100.0)	100.0 (100.0–100.0)		1	1 (100.0)	100.0 (100.0–100.0)		3	3 (100.0)	97.2 (97.1–98.6)		1
Others
Droxidopa	102	100 (98.0)	100.0 (96.1–100.0)		343	336 (98.0)	99.7 (95.6–100.0)		245	241 (98.4)	99.7 (95.8–100.0)		200	195 (97.5)	99.9 (96.0–100.0)		129	121 (93.8)	97.1 (92.7–100.0)		316	315 (99.7)	100.0 (97.3–100.0)		231	224 (97.0)	99.7 (95.8–100.0)		204	202 (99.0)	99.7 (95.9–100.0)		170	168 (98.8)	99.7 (96.0–100.0)		275	268 (97.5)	99.7 (95.6–100.0)		254	251 (98.8)	99.7 (96.0–100.0)		191	185 (96.9)	99.7 (95.5–100.0)		64
Amantadine	94	93 (98.9)	100.0 (96.6–100.0)		243	236 (97.1)	99.7 (96.4–100.0)		145	143 (98.6)	100.0 (96.6–100.0)		192	186 (96.9)	99.6 (96.4–100.0)		82	75 (91.5)	97.2 (89.4–100.0)		255	254 (99.6)	100.0 (97.6–100.0)		192	189 (98.4)	100.0 (97.4–100.0)		139	134 (96.4)	99.2 (95.3–100.0)		169	165 (97.6)	99.7 (95.5–100.0)		168	164 (97.6)	100.0 (96.9–100.0)		166	163 (98.2)	99.7 (96.9–100.0)		171	166 (97.1)	100.0 (95.9–100.0)		66
Istradefylline	91	89 (97.8)	100.0 (98.9–100.0)		228	225 (98.7)	100.0 (97.5–100.0)		151	149 (98.7)	100.0 (97.8–100.0)		168	165 (98.2)	100.0 (97.9–100.0)		50	46 (92.0)	95.6 (91.9–99.3)		269	268 (99.6)	100.0 (98.9–100.0)		148	147 (99.3)	100.0 (98.0–100.0)		167	163 (97.6)	100.0 (97.8–100.0)		70	69 (98.6)	100.0 (96.1–100.0)		249	245 (98.4)	100.0 (98.0–100.0)		253	251 (99.2)	100.0 (97.9–100.0)		66	63 (95.5)	99.9 (97.1–100.0)		50
Zonisamide	177	177 (100.0)	100.0 (97.6–100.0)		473	465 (98.3)	100.0 (97.8–100.0)		301	299 (99.3)	100.0 (97.9–100.0)		349	343 (98.3)	100.0 (97.7–100.0)		107	101 (94.4)	96.0 (91.0–99.7)		543	541 (99.6)	100.0 (98.6–100.0)		391	383 (98.0)	100.0 (97.5–100.0)		255	255 (100.0)	100.0 (97.9–100.0)		303	298 (98.3)	100.0 (97.8–100.0)		347	344 (99.1)	100.0 (97.7–100.0)		457	455 (99.6)	100.0 (97.9–100.0)		193	187 (96.9)	99.7 (97.5–100.0)		96
Abbreviations: IQR, interquartile range; PD, Parkinson’s disease; PDC, proportion of days covered.
[truncated: 17 more columns]

## Sheet: Supplementary Table 7
Supplementary Table 7. Sensitivity analysis of persistence of anti-PD drug treatment
Treatment	Sensitivity analysis 1:							Sensitivity analysis 2:
	15 days of threshold for gap period							Extended exposure washout window
	n	Persistent patients, n (%)	Persistent treatment period (days)					n	Persistent patients, n (%)	Persistent treatment period (days)
			Min	Q1	Median	Q3	Max			Min	Q1	Median	Q3	Max
All drugs	7605	2990 (39.3)	1	56	203	365	365	7428	3352 (45.1)	1	56.8	273	365	365
Non-ergot dopamine agonists
Pramipexole (immediate-release tablet)	329	115 (35.0)	1	28	91	365	365	307	123 (40.1)	1	29	133	365	365
Pramipexole (sustained-release tablet)	345	164 (47.5)	1	77	343	365	365	335	180 (53.7)	1	91	365	365	365
Ropinirole (immediate-release tablet)	52	17 (32.7)	1	28	79	365	365	50	17 (34.0)	1	28.3	86	365	365
Ropinirole (sustained-release tablet)	429	193 (45.0)	1	63	266	365	365	408	200 (49.0)	1	70	352.5	365	365
Ropinirole (transdermal patch)	1358	650 (47.9)	1	78.5	319.5	365	365	1339	726 (54.2)	1	91	365	365	365
Rotigotine (transdermal patch)	867	315 (36.3)	1	51	169	365	365	807	342 (42.4)	1	56	237	365	365
Monoamine oxidase B inhibitors
Selegiline	425	186 (43.8)	1	56	246	365	365	405	202 (49.9)	1	60	364	365	365
Rasagiline	932	437 (46.9)	2	62.3	294	365	365	903	470 (52.0)	2	63	365	365	365
Safinamide	876	437 (49.9)	3	63	363.5	365	365	870	487 (56.0)	7	77	365	365	365
Catechol-O-methyltransferase inhibitors
Entacapone	635	212 (33.4)	1	33	126	365	365	591	221 (37.4)	1	38.5	165	365	365
Opicapone	920	426 (46.3)	1	49.8	285	365	365	917	483 (52.7)	1	60	365	365	365
Anticholinergics
Trihexyphenidyl	200	58 (29.0)	1	35	111	365	365	191	74 (38.7)	1	35	144	365	365
Biperiden	7	2 (28.6)	28	38.5	81	263	365	7	2 (28.6)	28	38.5	81	263	365
Others
Droxidopa	574	284 (49.5)	1	65	350.5	365	365	556	310 (55.8)	1	84	365	365	365
Amantadine	459	199 (43.4)	1	59.5	245	365	365	435	222 (51.0)	1	63	365	365	365
Istradefylline	452	197 (43.6)	3	60	277	365	365	440	218 (49.5)	3	64	363.5	365	365
Zonisamide	850	460 (54.1)	1	86	365	365	365	818	493 (60.3)	2	99.5	365	365	365
Abbreviation: PD, Parkinson’s disease; Q, quartile.

## Sheet: Supplementary Table 8
Supplementary Table 8. Sensitivity analysis of PDC of anti-PD drug treatment
Treatment	Sensitivity analysis 1:							Sensitivity analysis 2:
	15 days of threshold for gap period							Extended exposure washout window
	n	PDC ≥80%, n (%)	PDC, %					n	PDC ≥80%, n (%)	PDC, %
			Min	Q1	Median	Q3	Max			Min	Q1	Median	Q3	Max
All drugs	5168	5057 (97.9)	7.1	97.6	100	100	100	5207	5052 (97.0)	7.1	96.1	99.7	100	100
Non-ergot dopamine agonists
Pramipexole (immediate-release tablet)	220	203 (92.3)	12.5	96.6	99.4	100	100	213	199 (93.4)	12.5	95.4	99.2	100	100
Pramipexole (sustained-release tablet)	255	251 (98.4)	69	97.9	100	100	100	254	241 (94.9)	17.6	96.6	99.7	100	100
Ropinirole (immediate-release tablet)	29	27 (93.1)	7.1	95.5	98.9	100	100	29	27 (93.1)	7.1	95.5	98.9	100	100
Ropinirole (sustained-release tablet)	322	311 (96.6)	15.4	98	100	100	100	310	298 (96.1)	20.8	97.6	100	100	100
Ropinirole (transdermal patch)	987	984 (99.7)	54	98.3	100	100	100	1004	996 (99.2)	54	97.5	100	100	100
Rotigotine (transdermal patch)	569	565 (99.3)	62.5	97.8	100	100	100	547	539 (98.5)	51.6	96.7	99.7	100	100
Monoamine oxidase B inhibitors
Selegiline	293	290 (99.0)	45.7	97.5	100	100	100	291	286 (98.3)	45.7	96.1	99.6	100	100
Rasagiline	640	634 (99.1)	14.3	98.5	100	100	100	636	626 (98.4)	14.3	97.7	100	100	100
Safinamide	624	622 (99.7)	44.4	97.6	100	100	100	638	626 (98.1)	36.4	96.1	99.7	100	100
Catechol-O-methyltransferase inhibitors
Entacapone	411	378 (92.0)	13.9	96.7	100	100	100	393	359 (91.3)	10.8	95.2	99.7	100	100
Opicapone	642	629 (98.0)	50	96.9	99.7	100	100	654	630 (96.3)	44.4	95.5	99.2	100	100
Anticholinergics
Trihexyphenidyl	114	112 (98.2)	53.6	97.2	100	100	100	112	110 (98.2)	60.8	94.9	99.4	100	100
Biperiden	4	4 (100.0)	97	97.1	98.6	100	100	4	4 (100.0)	97	97.1	98.6	100	100
Others
Droxidopa	428	422 (98.6)	17.5	97.2	100	100	100	433	424 (97.9)	17.5	95.9	99.7	100	100
Amantadine	327	322 (98.5)	21.4	97.8	100	100	100	319	311 (97.5)	21.4	96.5	99.7	100	100
Istradefylline	313	313 (100.0)	83.2	98.9	100	100	100	312	308 (98.7)	41.4	97.9	100	100	100
Zonisamide	638	634 (99.4)	12.5	98.5	100	100	100	624	617 (98.9)	35.5	97.7	100	100	100
Abbreviations: PD, Parkinson’s disease; PDC, proportion of days covered; Q, quartile.

## Sheet: Supplementary Table 9
Supplementary Table 9. PDC of anti-PD drug treatment to the last fill date in the follow-up period (sensitivity analysis 3)
Treatment		PDC ≥80%, n (%)	PDC, %
	n		Min	Q1	Median	Q3	Max
All drugs	5615	5036 (89.7)	0.8	92.9	99.1	100	100
Non-ergot dopamine agonists
Pramipexole (immediate-release tablet)	244	198 (81.1)	1	85.9	97.7	100	100
Pramipexole (sustained-release tablet)	274	248 (90.5)	17.6	95.1	99.4	100	100
Ropinirole (immediate-release tablet)	33	25 (75.8)	1.7	91.3	98.3	100	100
Ropinirole (sustained-release tablet)	339	304 (89.7)	7.7	94.4	99.7	100	100
Ropinirole (transdermal patch)	1068	994 (93.1)	6	95.1	99.7	100	100
Rotigotine (transdermal patch)	621	551 (88.7)	8.1	93.1	98.9	100	100
Monoamine oxidase B inhibitors
Selegiline	318	294 (92.5)	5	93.2	98.9	100	100
Rasagiline	686	638 (93.0)	14.3	95.8	100	100	100
Safinamide	674	631 (93.6)	10.2	94.7	99.1	100	100
Catechol-O-methyltransferase inhibitors
Entacapone	447	355 (79.4)	3.5	86.6	98.6	100	100
Opicapone	694	622 (89.6)	9.6	92.2	98.4	100	100
Anticholinergics
Trihexyphenidyl	129	113 (87.6)	1.7	89.8	97.8	100	100
Biperiden	4	4 (100.0)	97	97.1	98.6	100	100
Others
Droxidopa	473	421 (89.0)	12.7	91.9	98.8	100	100
Amantadine	356	315 (88.5)	0.8	92.3	99.1	100	100
Istradefylline	340	308 (90.6)	14.3	93.9	99.7	100	100
Zonisamide	682	631 (92.5)	14.1	95.4	99.7	100	100
Abbreviations: PD, Parkinson’s disease; PDC, proportion of days covered; Q, quartile.

## Sheet: Supplementary Table 10
Supplementary Table 10. MPR of anti-PD drugs treatment to the last fill date in the follow-up period (sensitivity analysis 4)
Treatment		MPR ≥80%, n (%)	MPR, %
	n		Min	Q1	Median	Q3	Max
All drugs	-	-	-	-	-	-	-
Non-ergot dopamine agonists
Pramipexole (immediate-release tablet)	244	198 (81.1)	1	91.7	100	100.4	241.7
Pramipexole (sustained-release tablet)	274	251 (91.6)	17.6	98.1	100	102.7	186.6
Ropinirole (immediate-release tablet)	33	25 (75.8)	1.7	91.7	100	100.5	145.9
Ropinirole (sustained-release tablet)	339	309 (91.2)	7.7	98.1	100	102.2	196.9
Ropinirole (transdermal patch)	1068	1019 (95.4)	6	100	102.2	115	456.5
Rotigotine (transdermal patch)	621	570 (91.8)	8.1	99.2	100.5	108	267.3
Monoamine oxidase B inhibitors
Selegiline	318	298 (93.7)	5	97	100	101.6	126.5
Rasagiline	686	647 (94.3)	14.3	99.1	100	102	171.4
Safinamide	674	639 (94.8)	10.2	97.7	100	101.9	159
Catechol-O-methyltransferase inhibitors
Entacapone	447	365 (81.7)	3.5	91.8	100	102	154.1
Opicapone	694	636 (91.6)	9.6	97.6	100	102.1	176.7
Anticholinergics
Trihexyphenidyl	129	115 (89.1)	1.7	95.8	100	100.8	124.7
Biperiden	4	4 (100.0)	100	100	105.3	114	123.9
Others
Droxidopa	473	431 (91.1)	16.9	97.3	100	102.5	182.9
Amantadine	356	323 (90.7)	0.8	97.7	100	102.1	126.1
Istradefylline	340	317 (93.2)	15.1	98.8	100	101.9	198.2
Zonisamide	682	640 (93.8)	14.1	99.4	100	102	146.5
Abbreviations: MPR, medication possession ratio; PD, Parkinson’s disease; Q, quartile.
